# Supplementary material
Source: Springer Nature journal article supplement (https://www.springermedizin.de/resource/supplementary/12889_2014_7114_MOESM1_ESM.pdf/9499886)
Supplement: MOESM1 [file 9499886]

**Additional file 1.** Words included in the SAHL-D

\*Words left out in the SAHL-D22

|     | <b>Dutch</b>  | <b>English translation</b> | <b>Topic area</b>            |
|-----|---------------|----------------------------|------------------------------|
| 1.  | Achillespees* | Achilles' tendon           | Body part or bodily function |
| 2.  | Adrenaline    | Adrenaline                 | Body part or bodily function |
| 3.  | Apathie       | Apathy                     | Diseases                     |
| 4.  | Apneu*        | Apnea                      | Diseases                     |
| 5.  | Bètablokker   | Beta blocker               | Tests and treatments         |
| 6.  | Biopsie       | Biopsy                     | Tests and treatments         |
| 7.  | Chiropractor  | Chiropractor               | Specializations              |
| 8.  | Chlamydia     | Chlamydia                  | Diseases                     |
| 9.  | Defibrillatie | Defibrillation             | Tests and treatments         |
| 10. | Delirium      | Delirium                   | Diseases                     |
| 11. | Dwarslaesie*  | Paraplegia                 | Diseases                     |
| 12. | Echografie*   | Echography                 | Tests and treatments         |
| 13. | Euforie       | Euphoria                   | Diseases                     |
| 14. | Geleermiddel  | Gelling agent              | Tests and treatments         |
| 15. | Hemofilie     | Hemophilia                 | Diseases                     |
| 16. | Hospice*      | Hospice                    | Tests and treatments         |
| 17. | Malaise*      | Malaise                    | Diseases                     |
| 18. | Manisch*      | Manic                      | Diseases                     |
| 19. | Obesitas      | Obesity                    | Diseases                     |
| 20. | Oedeem*       | Oedema                     | Diseases                     |
| 21. | Oncologie*    | Oncology                   | Specializations              |
| 22. | Orthodontie   | Orthodontics               | Specializations              |
| 23. | Palliatief    | Palliative                 | Tests and treatments         |
| 24. | Pancreas      | Pancreas                   | Body part or bodily function |
| 25. | Pessarrium    | Pessary                    | Tests and treatments         |
| 26. | Plaque        | (Dental) plaque            | Diseases                     |
| 27. | Prenataal*    | Prenatal                   | Tests and treatments         |
| 28. | Psoriasis     | Psoriasis                  | Diseases                     |
| 29. | Reflux        | Reflux                     | Diseases                     |
| 30. | Resistent*    | Resistant                  | Tests and treatments         |
| 31. | Schilfering   | Flaking                    | Diseases                     |
| 32. | Schizofrenie  | Schizophrenia              | Diseases                     |
| 33. | Ventrikel     | Ventricle                  | Body part or bodily function |
